# Supplementary material for: Multifunctional lignin biocomposite for broad-spectrum water purification
Source: Royal Society of Chemistry journal article supplement (doi:10.1039/d5va00282f), 2025-12-08
Supplement: d5va00282f1.pdf [file d5va00282f1.pdf]

## Supplementary Information

### Multifunctional Lignin Bio-Composite for Broad-Spectrum Water Purification

*Sritama Mukherjee<sup>1\*</sup>, Salvatore Lombardo<sup>2</sup>, Ulrica Edlund<sup>1\*</sup>*

<sup>1</sup>Department of Fiber and Polymer Technology, School of Chemistry, Biotechnology and Health, KTH Royal Institute of Technology, 10044 Stockholm, Sweden

<sup>2</sup>Department of Materials and Environmental Chemistry, Stockholm University, 10691 Stockholm, Sweden

## TABLE OF CONTENTS

| Items    | Title                                                                                                               | Page no. |
|----------|---------------------------------------------------------------------------------------------------------------------|----------|
|          | Formulae and Equations                                                                                              | 2-3      |
| Fig. S1  | <sup>1</sup> H NMR spectra of lignin, modifying reagents GTMAC and CHPSS and modified lignin (ZL)                   | 4        |
| Fig. S2  | <sup>1</sup> H NMR spectra showing chitosan and lignin reagents, followed by modified lignin (ZL) and ZLC composite | 5        |
| Fig. S3  | Photographic images of ZL, ZLC granules, powdered ZLC in dried form                                                 | 6        |
| Fig. S4  | pXRD patterns of chitosan, lignin, and as-synthesized ZL and ZLC materials                                          | 7        |
| Fig. S5  | SEM images of ZLC cross-section at higher magnification.                                                            | 8        |
| Fig. S6  | Kinetics of contaminant adsorption on ZLC fitted with intraparticle diffusion model                                 | 9        |
| Fig. S7  | pXRD spectra showing ZL and ZLC before and after adsorption of Cr and Cu ions                                       | 10       |
| Fig. S8  | Isotherm fits for linearized Langmuir and Freundlich models for Cr and Cu adsorption on ZL and ZLC                  | 11       |
| Fig. S9  | LC-MS/MS graphs showing elution time of various PFAS molecules                                                      | 12-13    |
| Fig. S10 | Isotherm fits for linearized Langmuir and Freundlich                                                                | 14       |

|          |                                                                                                                  |    |
|----------|------------------------------------------------------------------------------------------------------------------|----|
|          | models for adsorption of dyes on ZL and ZLC.                                                                     |    |
| Fig. S11 | FT-IR spectrum of MB                                                                                             | 15 |
| Fig. S12 | FT-IR spectrum of RhB                                                                                            | 16 |
| Fig. S13 | FT-IR spectrum of MO                                                                                             | 17 |
| Fig. S14 | FT-IR spectrum of EBT                                                                                            | 18 |
| Table S1 | Kinetic parameters for linearized pseudo-first and second-order models for the adsorption of contaminants on ZLC | 19 |
| Table S2 | Physicochemical parameters of field waters from a mining area                                                    | 20 |

## Formulae and Equations

**Equation (1):** The maximum uptake of contaminant ( $q_e$ ) by ZL/ZLC was calculated using the equation given below:

$$Uptake (qe) = \frac{(C_o - C_e)V}{m}$$

where  $q_e$  is the number of contaminant species adsorbed per gram of the adsorbent (mg/g) at equilibrium,  $C_e$  is the equilibrium concentration of the contaminant in the bulk solution (mg/L),  $C_o$  is the initial concentration (mg/L),  $V$  is the volume of solution (L) and  $m$  is the mass of the adsorbent (g).

**Equation (2):** The linearized form of the Langmuir equation used in this work is defined as,

$$\frac{C_e}{q_e} = \frac{C_e}{q_{max}} + \frac{1}{bq_{max}}$$

where  $q_e$  is the amount of adsorption at the surface of the adsorbent (mg/g),  $C_e$  is the equilibrium concentration of the solution (mg/L),  $q_{max}$  is the maximum surface density at

monolayer coverage and  $b$  is the Langmuir adsorption constant (L/mg) related to the free energy of adsorption and  $1/q_{\max}$  and  $1/bq_{\max}$  are the Langmuir constants.

**Equation (3):** The removal % of PFAS was calculated using the equation mentioned below:

$$\text{Removal \%} = \frac{C_o - C_e}{C_o} \times 100$$

where  $C_o$  and  $C_e$  are the initial and equilibrium concentrations of the PFAS, respectively.

**Equation (4):** A linear form of the Freundlich expression used in this work is defined as,

$$\text{Log } q_e = \frac{1}{n} \text{Log } C_e + \text{Log } K_f$$

where  $q_e$  is the amount of adsorption at the surface of the adsorbent (mg/g),  $C_e$  is the equilibrium concentration of the solution (mg/L),  $K_f$  is the Freundlich constant (mg/mg)(L/mg)<sup>1/n</sup>.

**Equation (5):** The linear form of pseudo first order kinetic equation is expressed as

$$\log (q_e - qt) = \log q_e - \frac{k_1}{2.303} t$$

where ‘ $q_e$ ’ and ‘ $qt$ ’ are the amount of contaminant adsorbed at equilibrium and at time ‘ $t$ ’ respectively, and ‘ $k_1$ ’ is the equilibrium rate constant of pseudo-first-order adsorption. The slope and intercept of the plot, ‘ $\log(q_e - qt)$ ’ vs. ‘ $t$ ’ were used to obtain the pseudo-first-order rate constant  $k_1$  and equilibrium adsorption density ‘ $q_e$ ’.

**Equation (6):** The linear form of pseudo-second-order kinetics is expressed as:

$$\frac{t}{qt} = \frac{1}{k_2 q_e^2} + \frac{t}{q_e}$$

where ‘ $q_e$ ’ and ‘ $qt$ ’ are the amount of contaminant adsorbed at equilibrium and at time ‘ $t$ ’ (mg/mg), respectively, and  $k_2$  is the equilibrium rate constant of pseudo-second-order adsorption. The second-order rate constant ‘ $k_2$ ’ and ‘ $q_e$ ’ values were determined from the slopes and intercepts of the plots.

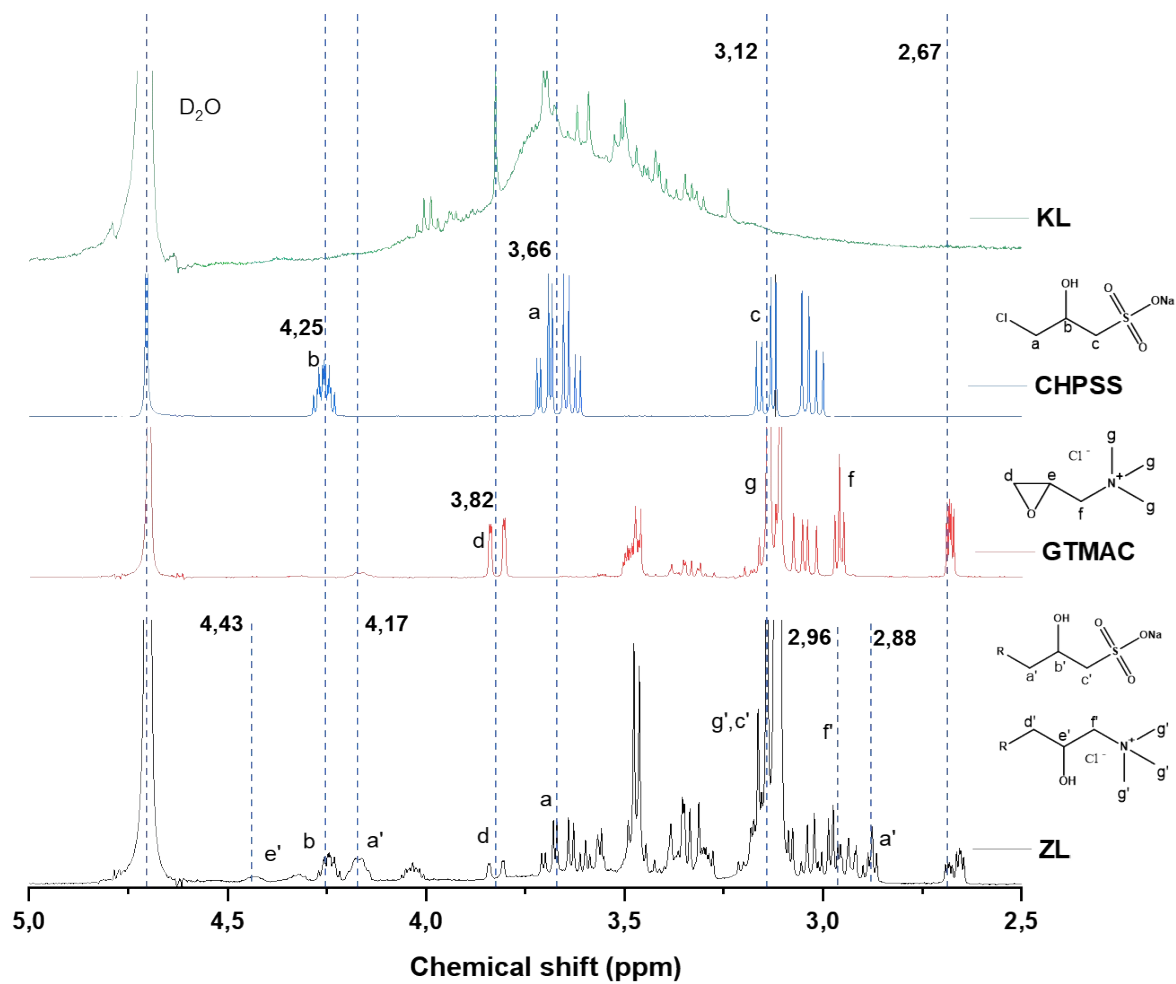

**Fig. S1.**  $^1\text{H}$  NMR spectra of lignin, modifying reagents GTMAC and CHPSS, and modified lignin (ZL).

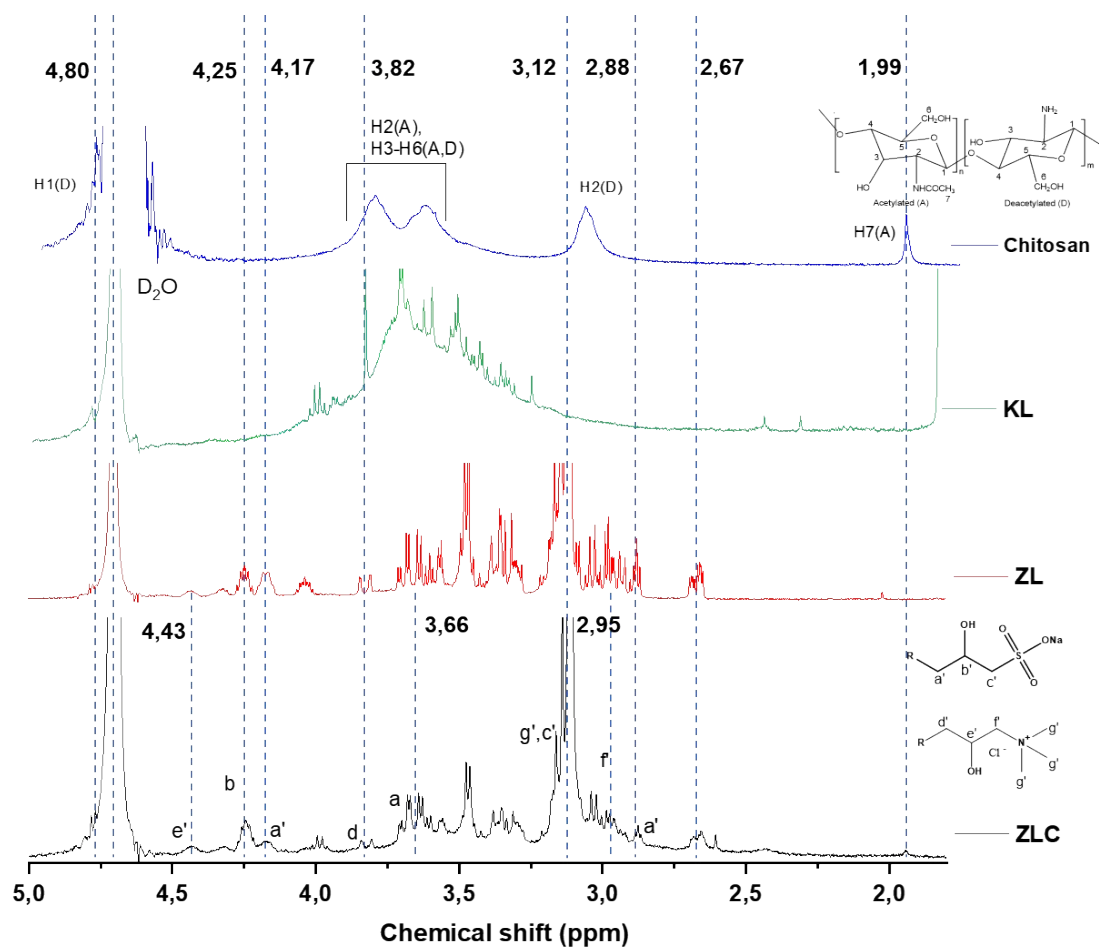

**Fig. S2.**  $^1\text{H}$  NMR spectra showing chitosan and lignin reagents, followed by modified lignin (ZL) and ZLC composite.

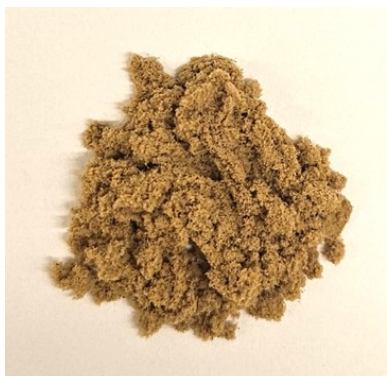

Dried ZL

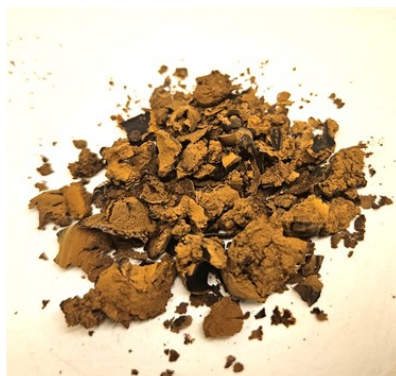

Dried ZLC granules

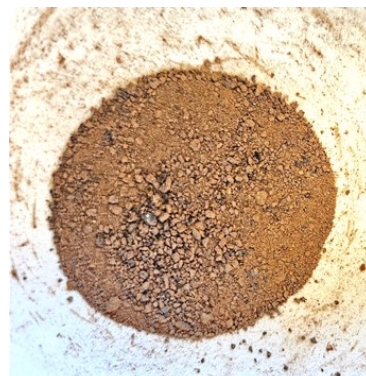

Powdered ZLC

**Fig. S3.** Photographic images of ZL, ZLC granules, and powdered ZLC in dried form.

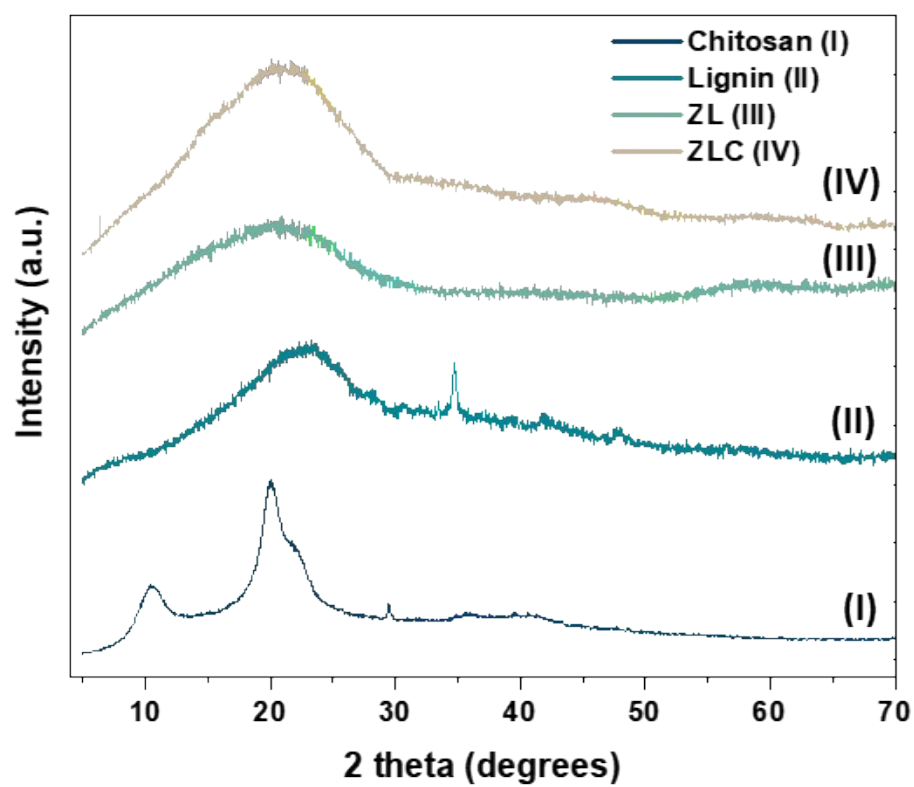

**Fig. S4.** pXRD patterns of chitosan, lignin, as-synthesized ZL, and ZLC materials.

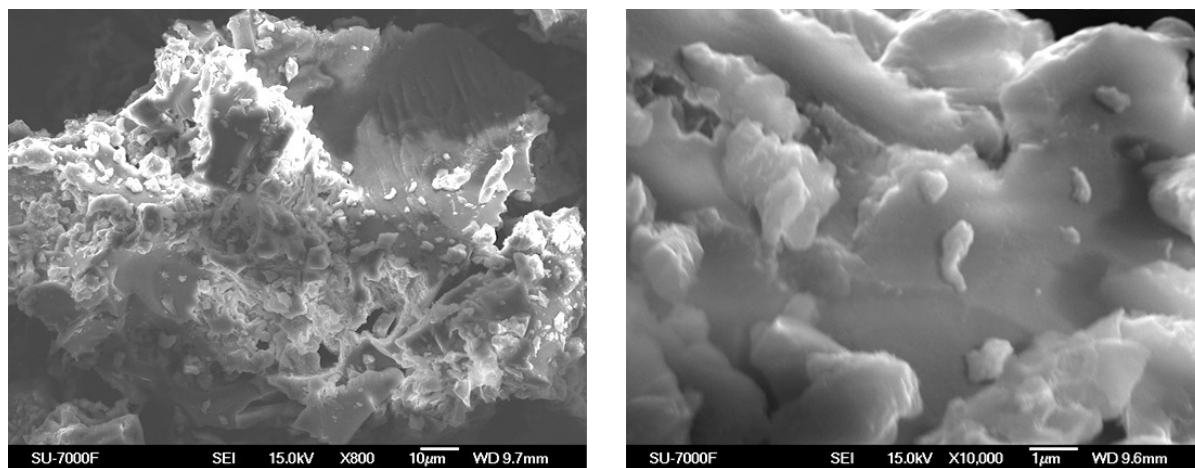

**Fig. S5.** SEM images of ZLC cross-section at higher magnification.



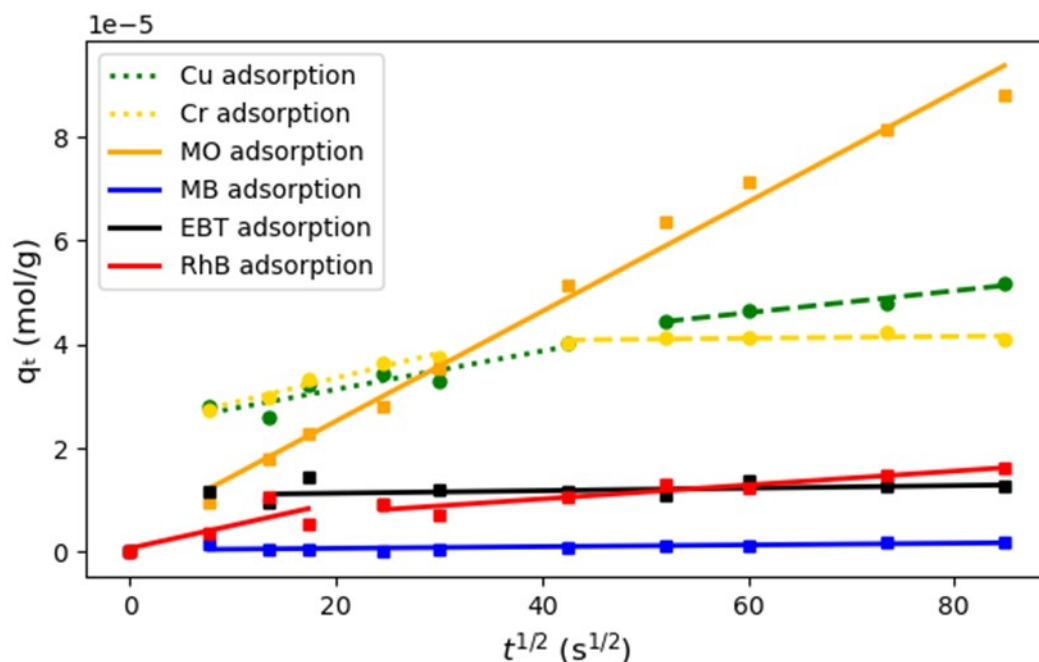

**Fig. S6.** Kinetics of contaminant adsorption on ZLC fitted with the intraparticle diffusion model.

For metal ions, adsorption proceeded through three stages: a rapid surface interaction within the first minute, followed by diffusion into the pores (completed within the first hour for Cr(VI)), and finally equilibrium. For Cu(II), diffusion was slower, but the decrease in adsorption rate after 2 h indicated that equilibrium was approaching. Overall, most adsorption occurred rapidly, confirming that surface interactions dominate the process. Dyes were adsorbed more slowly than metal ions. The intraparticle diffusion model showed a single linear region, and equilibrium was not reached within 2 h. This slower behavior may result from their larger molecular size and possible aggregation, which hinder diffusion into micropores, or from alternative interaction modes possible for dyes (e.g.,  $\pi$ - $\pi$  or van der Waals forces).

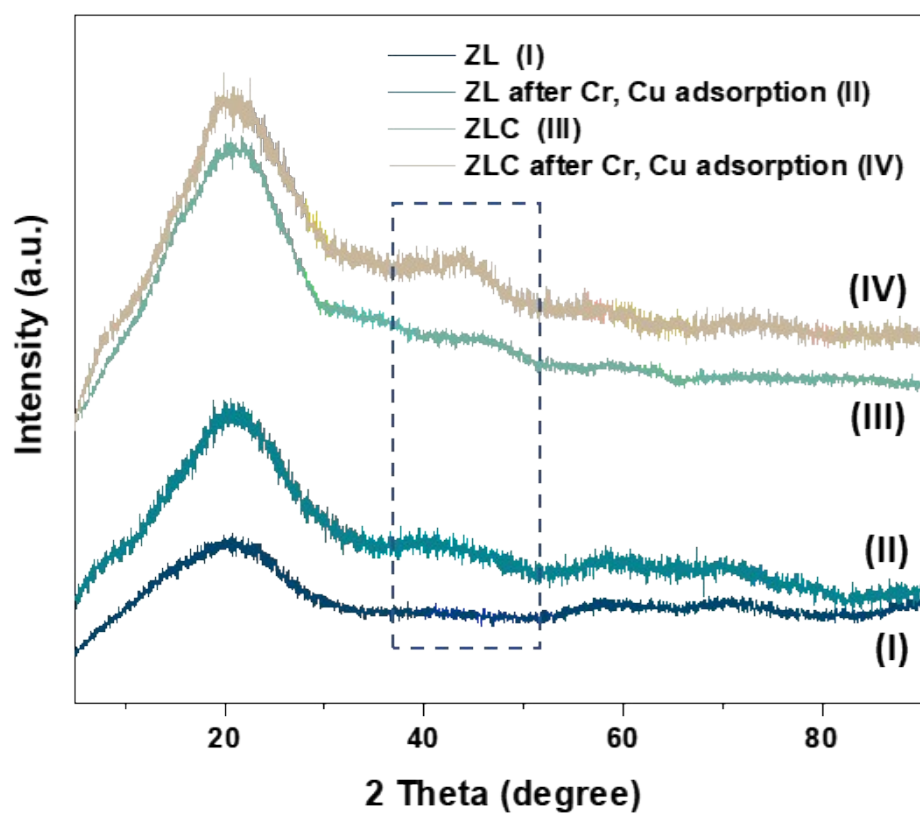

**Fig. S7.** pXRD patterns of ZL and ZLC before and after adsorption of Cr and Cu ions.

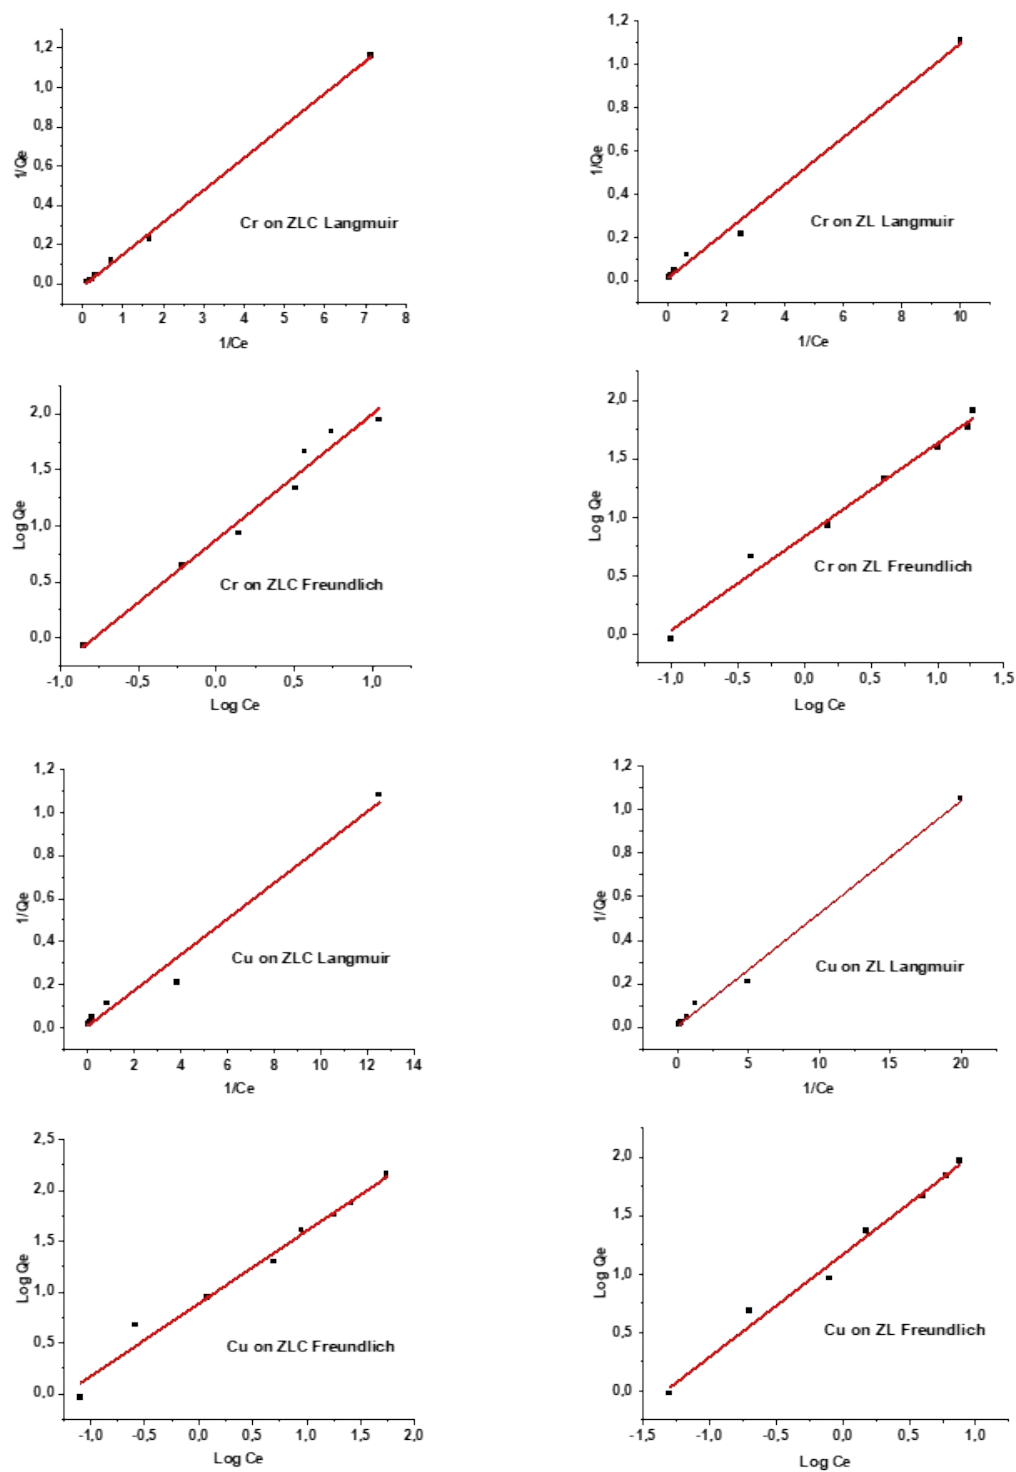

**Fig. S8.** Isotherm fits for linearized Langmuir and Freundlich models for Cr and Cu adsorption on ZL and ZLC.

Spiked PFAS in H<sub>2</sub>O

**(a)**

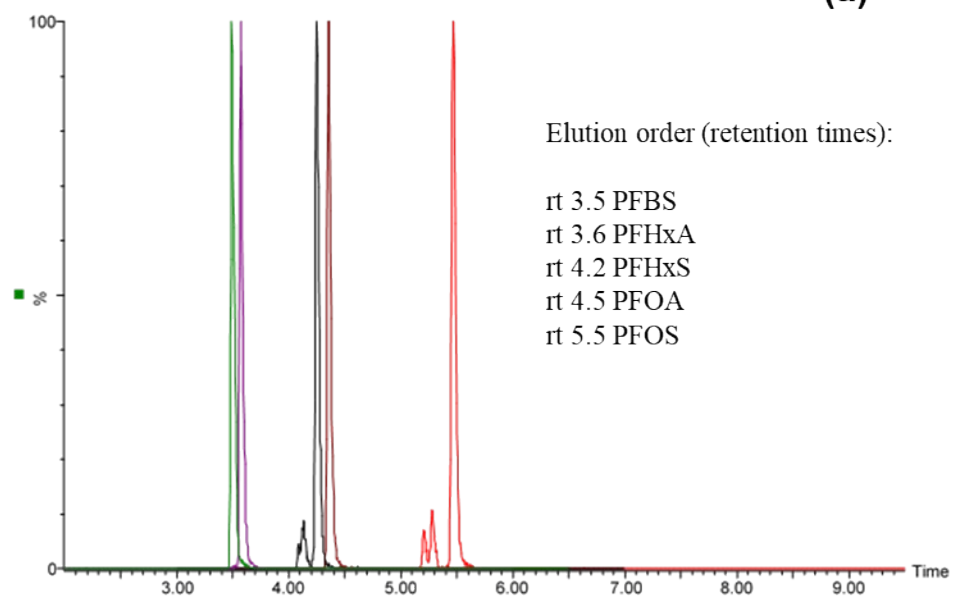

500 mg/l ZLC

**(b)**

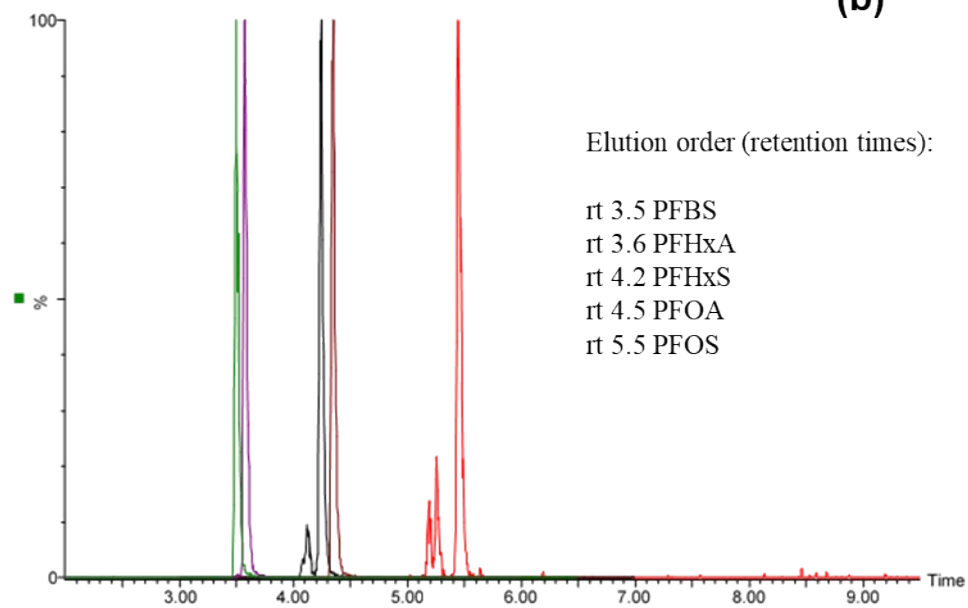

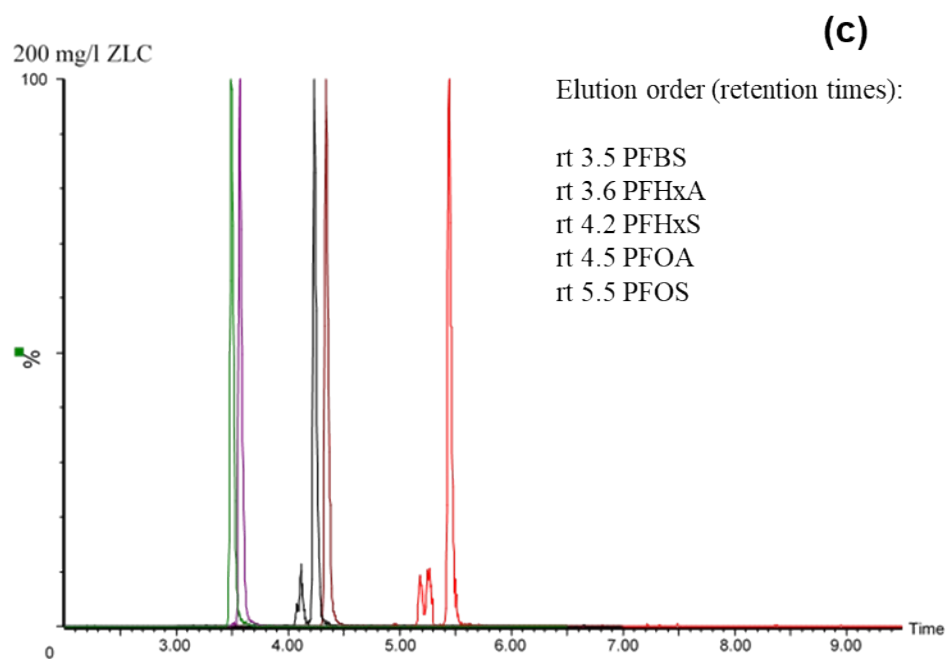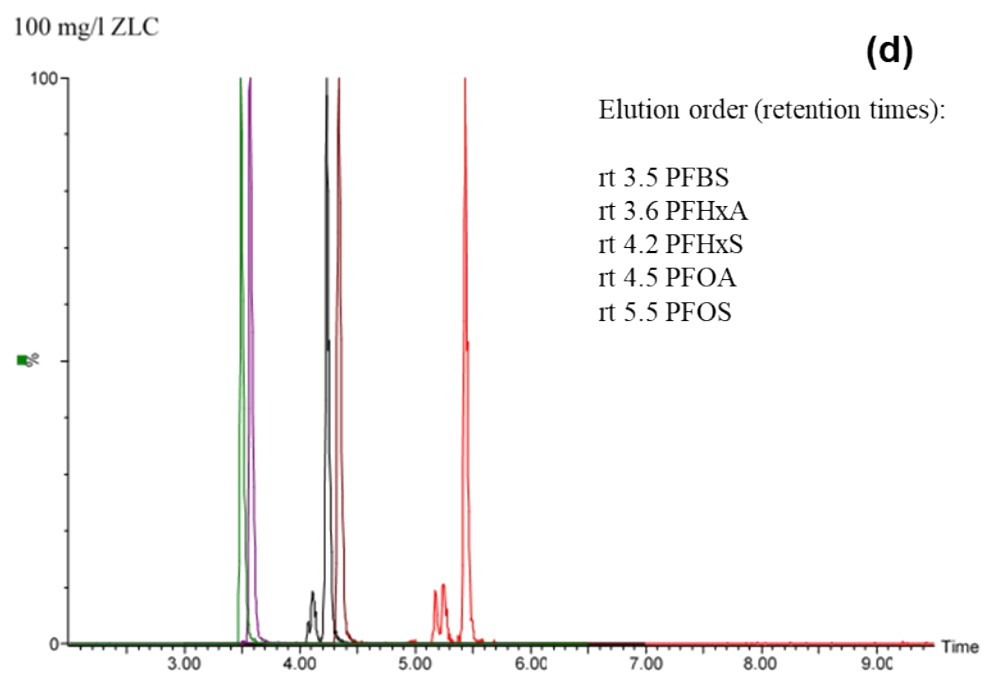

**Fig. S9.** LC-MS/MS graphs showing elution time of various PFAS molecules in case of (a) PFAS stock solution, (b) PFAS treated 500 mg/L ZLC, (c) 200 mg/L ZLC, and (d) 100 mg/L ZLC.

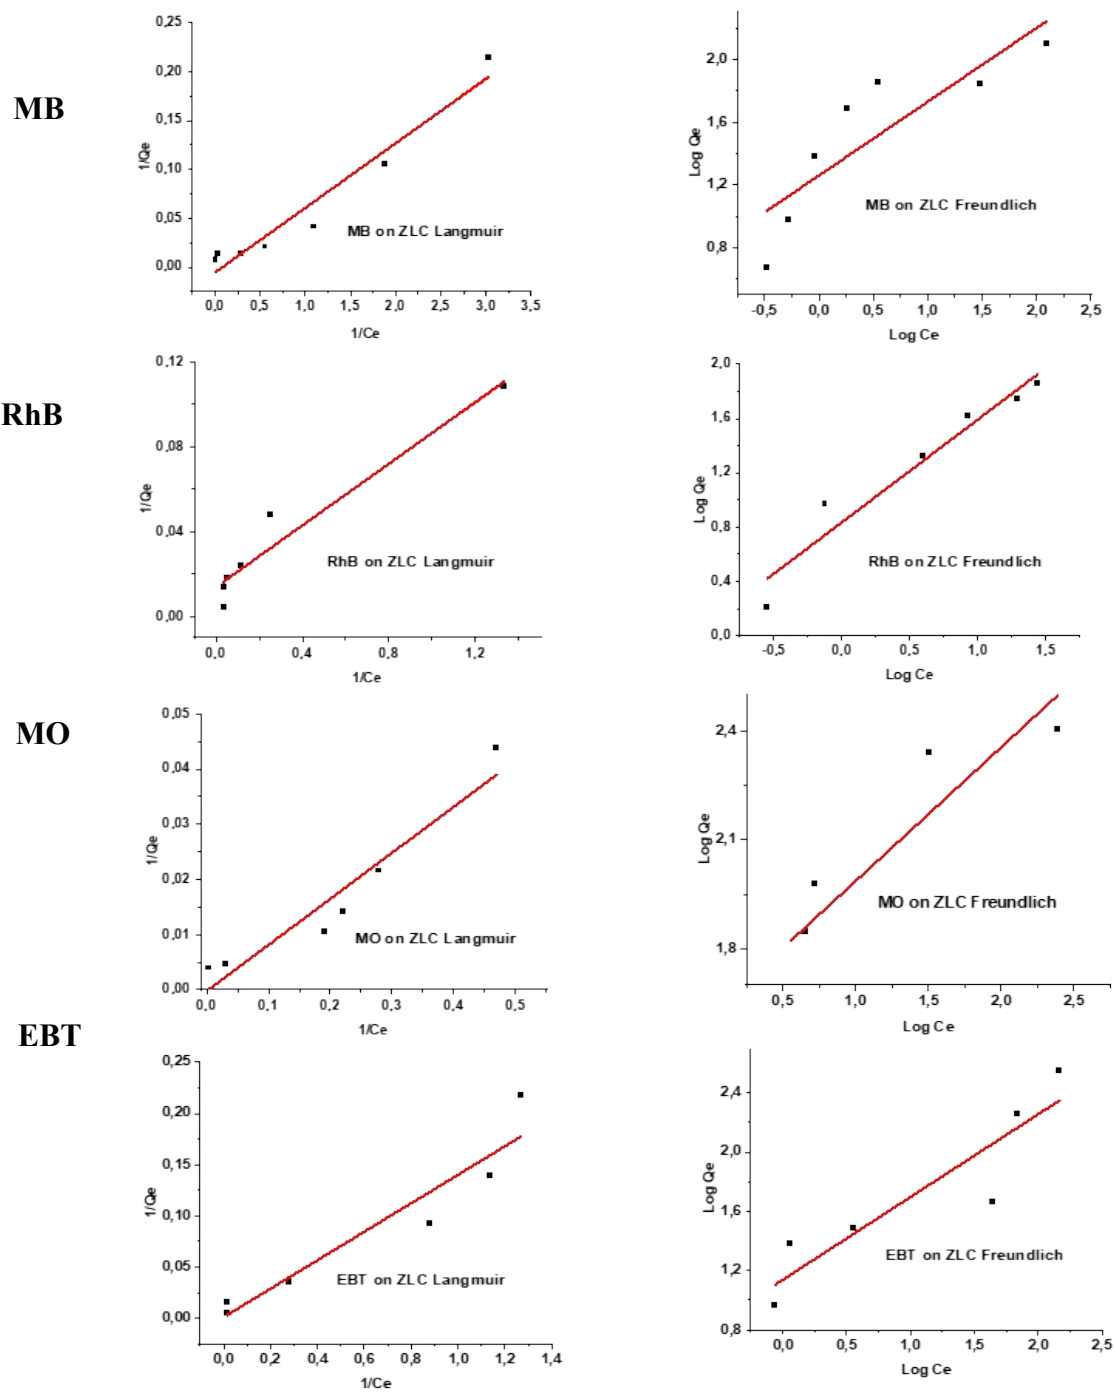

**Fig. S10.** Isotherm fits for linearized Langmuir (left) and Freundlich (right) models for the adsorption of dyes on ZL and ZLC.

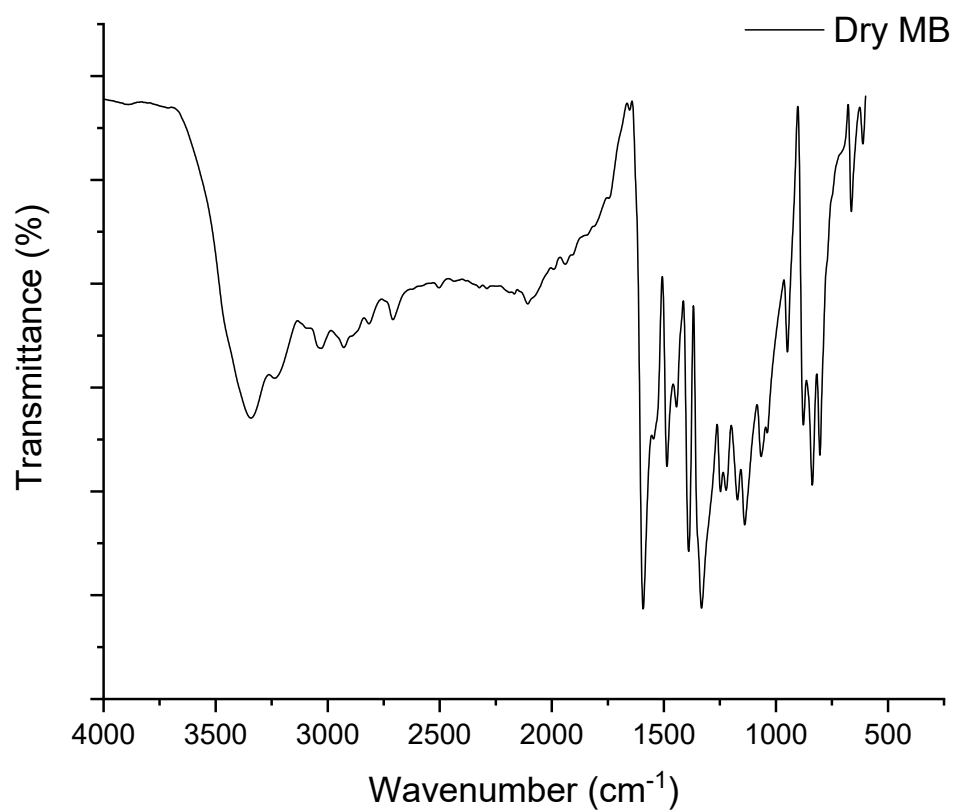

**Fig. S11.** FT-IR spectrum of dry MB dye.

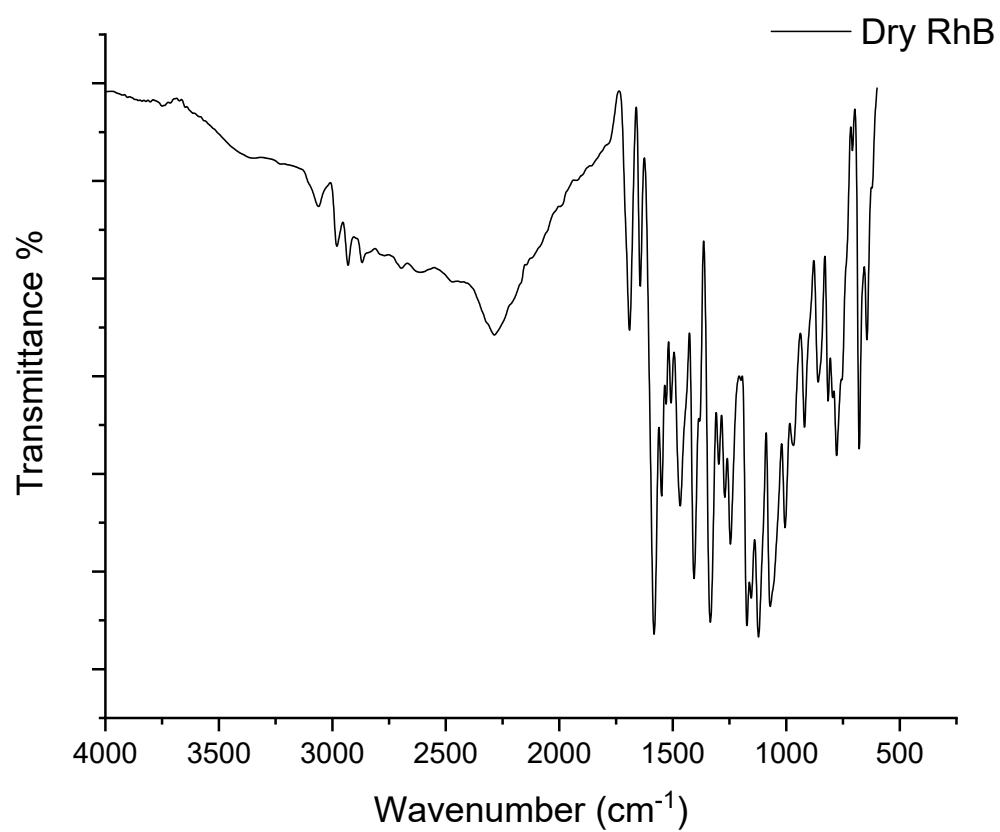

**Fig. S12.** FT-IR spectrum of dry RhB dye.



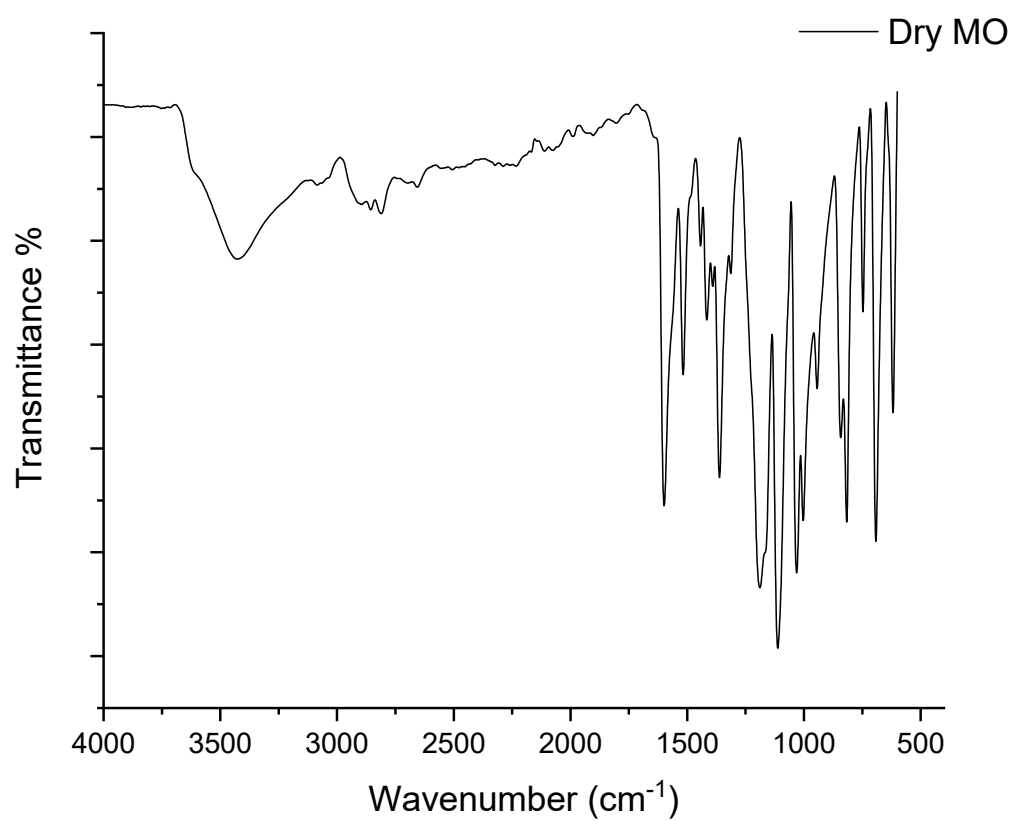

**Fig. S13.** FT-IR spectrum of dry MO dye.

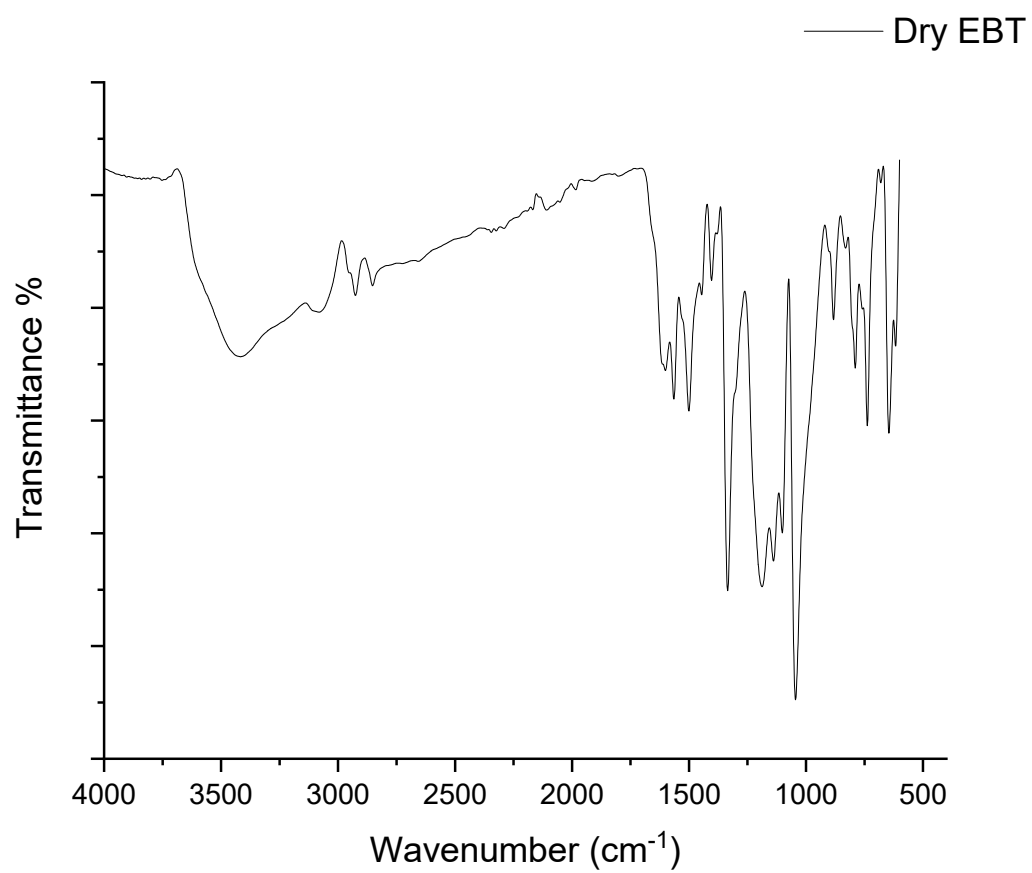

**Fig. S14.** FT-IR spectrum of dry EBT dye.

**Table S1.** Kinetic parameters for linearized pseudo-first and second-order models for the adsorption of contaminants on ZLC.

**Units:**

**K (pseudo first order model) = sec<sup>-1</sup>**

**K (pseudo first order model) = L mol<sup>-1</sup> sec<sup>-1</sup>**

**Q<sub>e</sub> = mol L<sup>-1</sup>**

| Species           | Model            | K        | Q <sub>e</sub> | R <sup>2</sup> |
|-------------------|------------------|----------|----------------|----------------|
| Methylene Blue    | pseudo 1st order | 2.00E-04 | 1.20E-06       | 0.93           |
|                   | pseudo 2nd order | 5.99     | 9.13E-5        | 0.96           |
| Rhodamine B       | pseudo 1st order | 3.00E-05 | 1.49           | 0.78           |
|                   | pseudo 2nd order | 20.15    | 7.04E-05       | 0.98           |
| Methyl Orange     | pseudo 1st order | 4.00E-09 | 5.37E-05       | 0.84           |
|                   | pseudo 2nd order | 11.35    | 5.42E-05       | 0.98           |
| Erichrome Black T | pseudo 1st order | 4.00E-5  | 7.40E-02       | 0.05           |
|                   | pseudo 2nd order | 388.85   | 2.50E-08       | 0.98           |
| Cu                | pseudo 1st order | 2.00E-4  | 6.94E-05       | 0.97           |
|                   | pseudo 2nd order | 49.32    | 6.37E-05       | 0.99           |
| Cr                | pseudo 1st order | 8.00E-4  | 4.24E-05       | 0.92           |
|                   | pseudo 2nd order | 572.50   | 4.29E-05       | 0.99           |

**Table S2.** Physicochemical parameters of field waters from a mining area.

| Parameter                    | Sample 1 (µg/L) | Sample 2 (µg/L) |
|------------------------------|-----------------|-----------------|
| pH                           | 8.3             | 8,6             |
| Dissolved Organic Carbon DOC | 1500            | 13000           |
| Total Suspended Solids TSS   | 2200            | 2440            |
| NO <sub>3</sub> -N           | 2000            | 3400            |
| NH <sub>4</sub> -N           | 1650            | 1000            |
| SO <sub>4</sub>              | 1039000         | 1200000         |
| Cu(II)                       | 11.3            | 2.4             |
| Cr(VI)                       | 0.18            | 0.34            |
| Ca(II)                       | 374000          | 474000          |
| Al(III)                      | 338             | 12              |
| Na(I)                        | 26000           | 48800           |
| K(I)                         | 14000           | 85000           |
